# Supplementary material for: Crosstalk from Non-Cancerous Mitochondria Can Inhibit Tumor Properties of Metastatic Cells by Suppressing Oncogenic Pathways
Source: PubMed Central journal article supplement (PMC3650012; doi:10.1371/journal.pone.0061747), 2013-05-09
Supplement: pone.0061747.s002.pdf [file pone.0061747.s002.pdf]

Supplementary Table-1: qRT-PCR primers used for microarray validation

| <b>Gene</b> | <b>Forward Primer</b> | <b>Reverse Primer</b>   |
|-------------|-----------------------|-------------------------|
| PPP1R15A    | GCCCAGAAACCCCTACTCAT  | GCCAGGAAATGGACAGTGAC    |
| RAB11B      | GGGACGACGAGTACGACTACC | CTCCAGGTTGAACTCGTTGC    |
| TGFB1       | CCAAAGGAAAATCTGTGGCA  | TTGAGAGTGGTAGGGCTGCT    |
| IRF7        | GTGATGCTGCGGGATAACTC  | TCAGTCTGGTCCGTGCCT      |
| DLG1        | TTCAGAGACACTGCCAAGCA  | TCATTTGTGATTTGTGGGGA    |
| KIF23       | GAACTAACCGGACCAGAGCA  | TGGTTCTCTCTTAGGACATCCAT |
| LRPPRC      | CATGCCGCCTCCTATCTG    | TTTTCTTTGGCAGCAATGG     |
| THAP2       | GGGCTGTGCCACTACCTACA  | AAAATTTTTGCGCCTAACCA    |
| POLQ        | TTTTGCTGACCTGCAAAGAG  | TCCAATCCTCAAACATAGGTG   |
| CENTD1      | TGAACCTGGCTCTGCTTACC  | TTCCTTCTTTGATGCTTCCC    |
| B2M         | TAGCTGTGCTCGCGCTACT   | TCTCTGCTGGATGACGTGAG    |
